# Supplementary material for: Development of a new Nano-particle sizer equipped with a 12 channel multi-port differential mobility analyzer and multi-condensation particle counters
Source: Copernicus journal article supplement (doi:10.5194/amt-2019-438), 2019-11-28
Supplement: Supplementary file 1 [file amt-2019-438-supplement.pdf]

## **Supplementary Material**

### ***Development of a new Nano-particle sizer equipped with a 12 channel multi-port differential mobility analyzer and multi-condensation particle counters***

**Hong Ku Lee<sup>1</sup>, Handol Lee<sup>2</sup> and Kang-Ho Ahn<sup>2,\*</sup>**

*<sup>1</sup>Department of Mechanical Engineering, Hanyang University, Seoul, 04763, R. of Korea.*

*<sup>2</sup>Department of Mechanical Engineering, Hanyang University, Ansan, 15588, R. of Korea.*

---

\* Corresponding author. Tel: +82-31-417-0601; Fax: +82-31-436-8184

E-mail address: khahn@hanyang.ac.kr

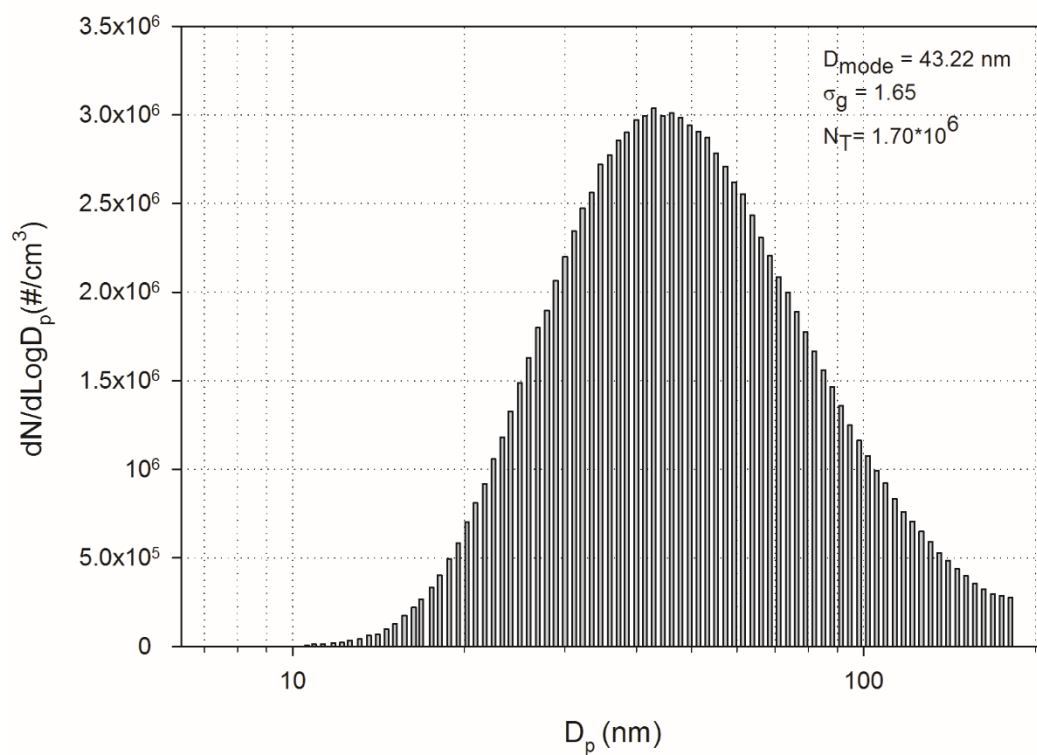

**Figure S1. Particle size distribution of atomized NaCl particles. The mode size and geometric standard deviation of the particles were 43.22 nm and 1.65.**
